# Supplementary material for: Light extraction from quantum dot light emitting diodes by multiscale nanostructures
Source: Royal Society of Chemistry journal article supplement (doi:10.1039/d0na00150c), 2020-01-01
Supplement: d0na00150c1.pdf [file d0na00150c1.pdf]

## Electronic Supplementary Information

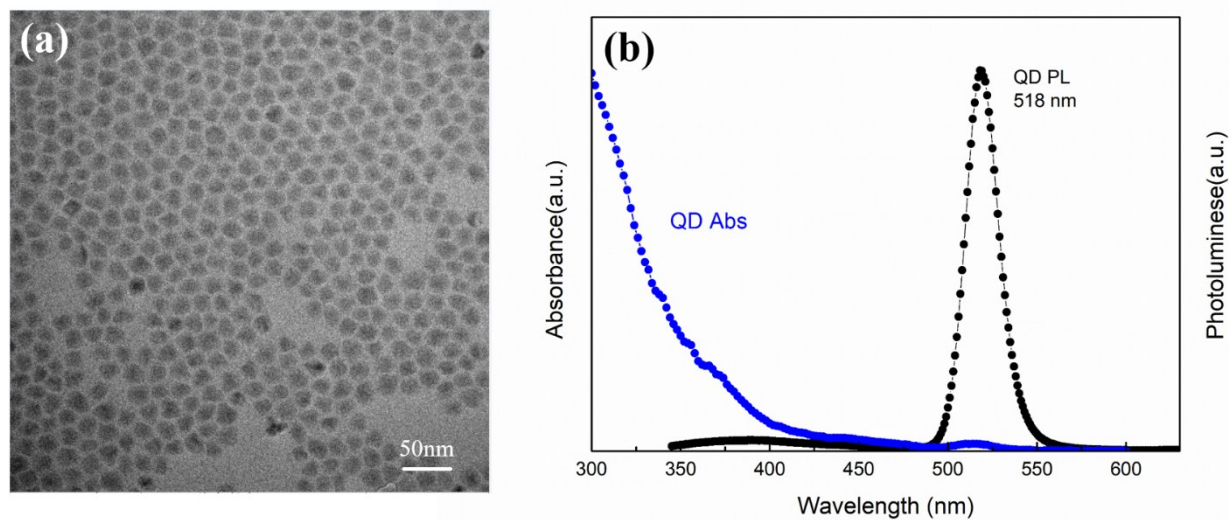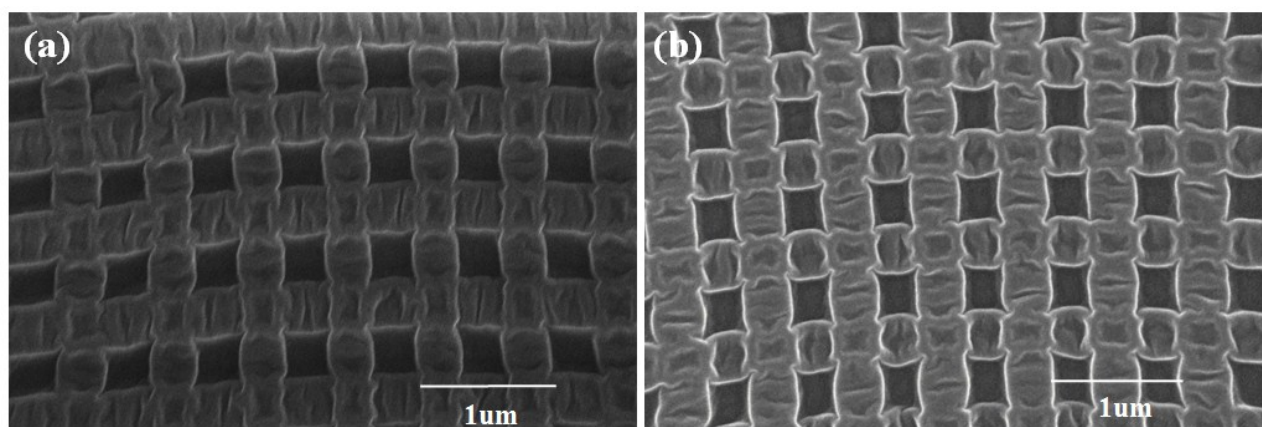

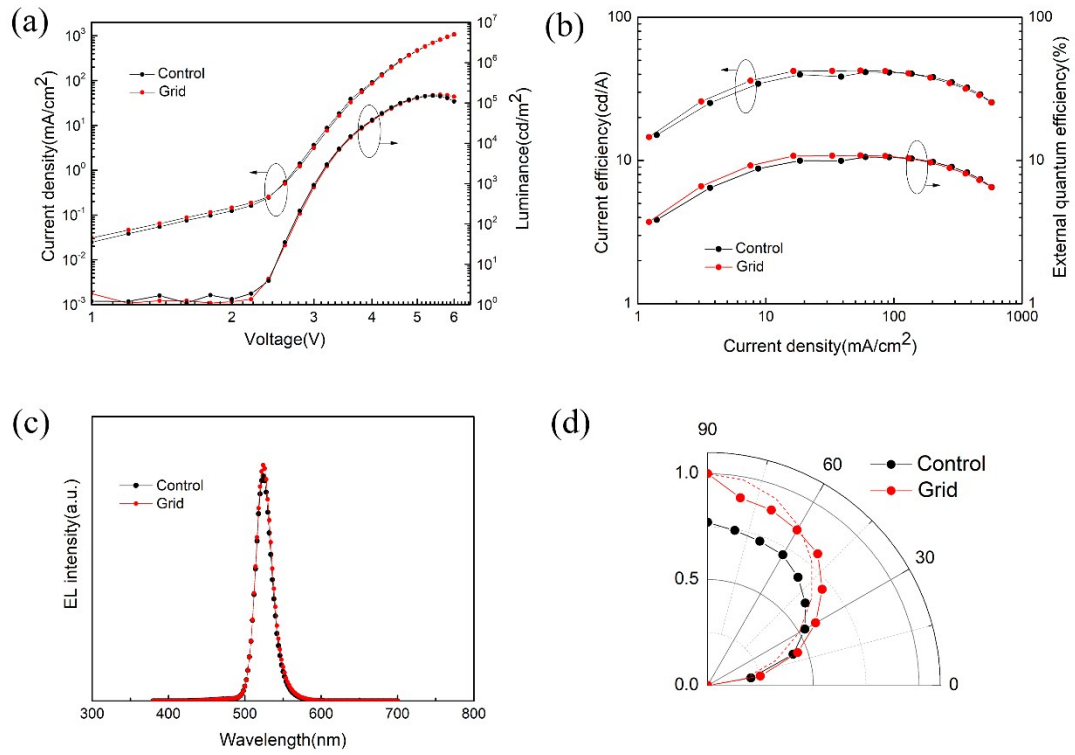

FigureS3 Performance characteristics of the control and grid nanostructured QLED. (a) Current density-luminance-voltage characteristics. (b) Current efficiency and external quantum efficiency as a function of current density. (c) Normalized EL spectra. (d) Normalized EL spectra with different viewing angles.

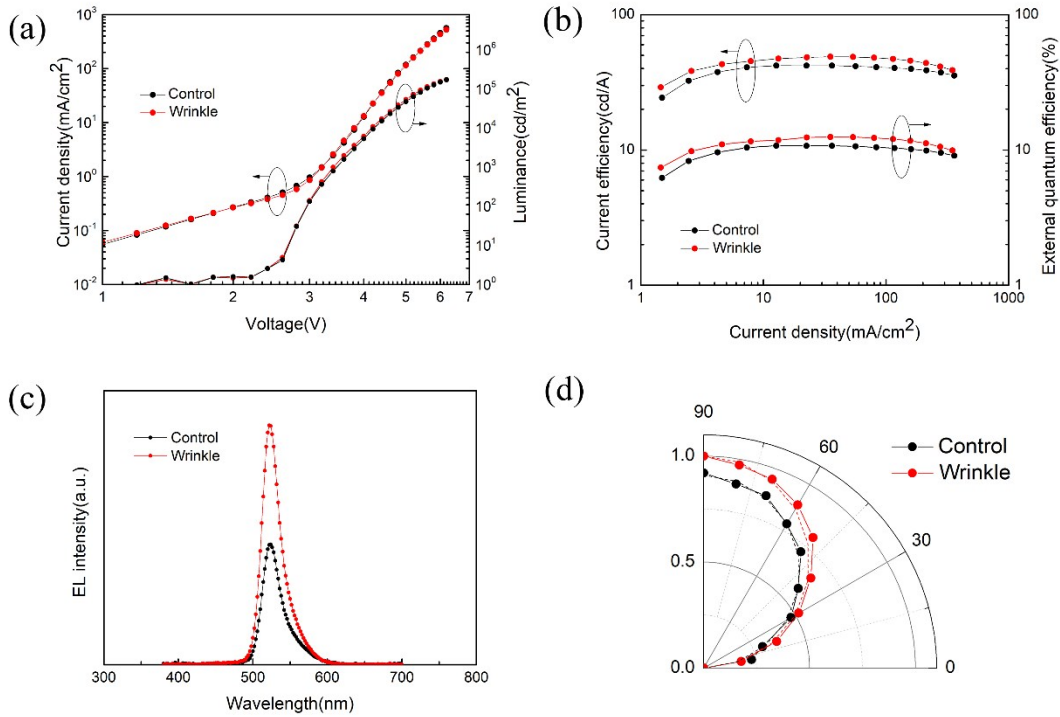

FigureS4 Performance characteristics of the control and wrinkle nanostructured QLED. (a) Current density-luminance-voltage characteristics. (b) Current efficiency and external quantum efficiency as a function of current density. (c) Normalized EL spectra. (d) Normalized EL spectra with different viewing angles.

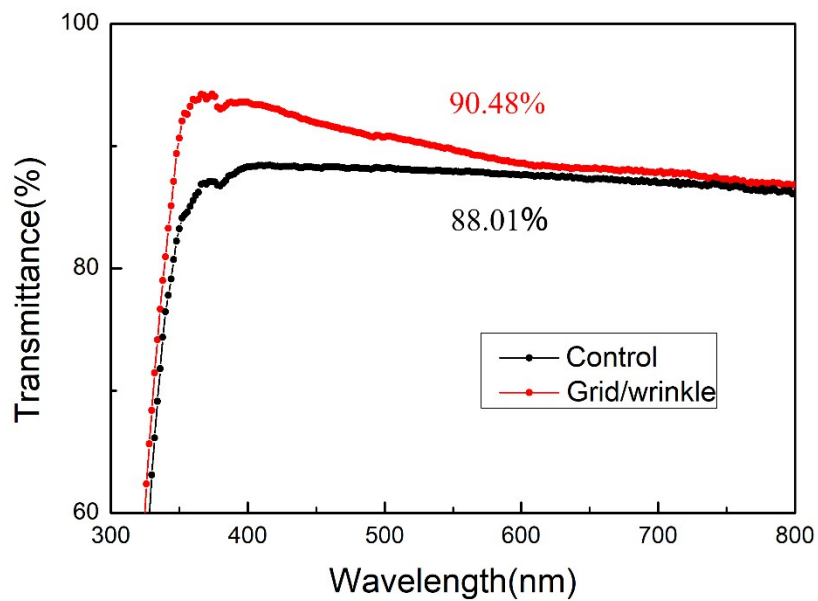

FigureS5. The transmittance spectrum of control and grid/wrinkle PDMS substrate.
